# Supplementary material for: Conservation of mucosal associated invariant T (MAIT) cells and the MR1 restriction element in ruminants, and abundance of MAIT cells in spleen
Source: PubMed Central journal article supplement — Vet Res. 2010 May 31;41(5):62. doi: 10.1051/vetres/2010034 (PMC2896809; doi:10.1051/vetres/2010034), 2010-05-31
Supplement: vetres-41-62-s1.pdf [file vetres-41-62-s1.pdf]

Supplementary Figure 1.

**Ovine and bovine MAIT cell TCR  $\alpha$  chain nucleotide sequences and location of primers.**

In red: primers used for cloning and sequencing of bovine and ovine MAIT TCR; in blue: primers used in MAIT V region and  $\alpha$  chain constant region qPCR; in pink: qPCR probes; in grey: CDR regions.

```

    primer boovUntr3f
ovine  AGCGCCTGGTTTGTGGTGTCTGCAGCAGATGTGGAATTTTTTCCTTCTTTGTGTTTCCC
ovine  TGACAGTGAGAGGCTCTGCAGGAAAAGGCGTTGAGCAGCCCACTGAGTTGACGGTTATGG
bovine  GCTCTGCAGGAAAAGGCGTTAAGCAGCCCACTGAGTTGATGGCTATAG
        primer "I"

                                CDR1
ovine  AAGGAGCCTCTGCCAGGTCAACTGCACCTACCAGACATCTGGGTTCAATGGACTGTTCT
bovine  AAGGAGCCTCTGCCAGGTTAACTGCACCTACCAGACATCTGGATTCAATGGACTGTTCT

                                CDR2
ovine  GGTACCAGCGACATGATGGTGGAGCACCTGTGTTTCTCTTACAATGTTTTGGATGGTT
bovine  GGTACCAGCAACAGATGGTGGAGCACCTGTGTTTCTCTTACAATGTTCTGGATGGTT

                                primer boAV19
ovine  TGGAGACGAGAGGTCATTTTTCTTCATTCCCTTAGACGCTCTGATGCACACAGTTACCTCC
bovine  TGGAGACGAGAGGTCATTTTTCTTCATTCCCTTAGACGCTCTGATGCACACAGTTACCTCC

                                probe boAV19                                CDR3
ovine  TTCTGAAGGAAGTCCACATGAAAGACTTTGCCTCTTACCTCTGTGCTGTGATGGATGGCA
bovine  TTCTGAAGGAAGTCCACATGAAAGACTTTGCCTCTTACCTCTGTGTTGTGATGGATGGCA

primers boAJ33/ovAJ33
ovine  ACTATCGGTTGATCTGGGGCTCTGGGACCAAGCTAATTATAAAGCCAGAAATCAAGGACC
bovine  ACTATCAGTGGATCTGGGGCTCTGGGACCAACTAATTATAAAGCCAGAAGTCAAGGACC

ovine  CCAACCCCACTGTGTACCAGCTGAGAAGCCCCGAATCCAGCAACACTTCTGTCTGCCTGT
bovine  CCAACCCCACTGTGTACCAGCTGAGAAGCCCCCAATCCAGTGACACTTCTGTCTGCCTAT

ovine  TCACCGATTTTGACTCAAATCAAATCAACTGACACAAATTTGGGGGTACGAGTGGAAACA
bovine  TCACCGATTTTGATTCAAATCAAGTCAACATGGAAAAAATCATGGGGTCCGAGGGGAGCA

ovine  TGGTACACAAAACAGACAGCACCGTGTCAACATGGAGATCCTGGGGTCCAAGAGCAACG
bovine  CGGTGCACAAAACAAAACAGCACCGTGTCAACATGGAGATCCTGGGATCCAAGAGCAACG

                                primer NGconst-f                                probe NGconst
ovine  GGATAGTGACTTGGGGAAACACCAGCGATTCTGGATGCACAAAACACCTTCAACGAGAACA
bovine  GGATAGTGACTTGGGGAAACACCAGCGATGCTGGATGCGAATAACACCTTCAACGAGACCA
        primer alpha

                                primer NGconst-r
ovine  TTGAGTTTGTGACAACCTTCGGAATCCCCTGTGATGCCAAGCTGGTAGAGAAAAGCTTTG
bovine  TTCCCTTCGCCTCCAGCTTGGAAATCTCCTGTAATGCAACCTGGTAGAGAAAAGCTTTG
        probe const alpha                                primer "K"

ovine  AAAACAGATGTGAACCTAAACTCCCAAACCTGTCAGTGACTGTGTTCCGCATCCTCCTCC

                                primer CorovC3r
ovine  TGAAGGTGGTCGGGTTTAACCT
    
```
